# Supplementary material for: Assessment of theoretical prediction of the NMR shielding tensor of195PtClxBr6−x2−complexes by DFT calculations: experimental and computational results
Source: Royal Society of Chemistry journal article supplement (doi:10.1039/b500574d), 2005-01-01
Supplement: tables1.pdf [file tables1.pdf]

**Table S1.** Contributions to the paramagnetic isotropic and the spin-orbit (Fermi contact) isotropic NMR shielding.

| Compound                                                | Paramagnetic Isotropic NMR<br>Shielding contribution (ppm) |                     |         | Fermi contact Isotropic NMR<br>Shielding contribution (ppm) |                     |        |
|---------------------------------------------------------|------------------------------------------------------------|---------------------|---------|-------------------------------------------------------------|---------------------|--------|
|                                                         | Valence-<br>Virtual                                        | Valence-<br>Valence | total   | Valence-<br>Virtual                                         | Valence-<br>Valence | total  |
| $[\text{PtCl}_6]^{-2}$                                  | 0                                                          | 0                   | 0       | 0                                                           | 0                   | 0      |
| $[\text{PtCl}_5\text{Br}]^{-2}$                         | -112.1                                                     | -54                 | -166.7  | -76.7                                                       | -33.9               | -110.7 |
| trans-<br>$[\text{PtCl}_4\text{Br}_2]^{-2}$             | -216.8                                                     | -109.8              | -326.4  | -181.3                                                      | -76.8               | -258   |
| cis-<br>$[\text{PtCl}_4\text{Br}_2]^{-2}$               | -237.8                                                     | -106.5              | 344     | -156.1                                                      | -66.7               | -222.8 |
| facial<br>$[\text{PtCl}_3\text{Br}_3]^{-2}$<br>$C_{3v}$ | -377.1                                                     | -154                | -531    | -263.8                                                      | -108.8              | -372.6 |
| meridian<br>$[\text{PtCl}_3\text{Br}_3]^{-2}$           | -358                                                       | -159.1              | -516.7  | -236.8                                                      | -108.8              | -372.6 |
| trans<br>$[\text{PtCl}_2\text{Br}_4]^{-2}$              | -490.4                                                     | -209.7              | -699.5  | -375.9                                                      | -150.3              | -526.1 |
| cis<br>$[\text{PtCl}_2\text{Br}_4]^{-2}$                | -511.2                                                     | -203.6              | -714.3  | -350.8                                                      | -138.5              | -489.3 |
| $[\text{PtClBr}_5]^{-2}$                                | -659                                                       | -250                | -908.3  | -467.5                                                      | -178.1              | -645.6 |
| $[\text{PtBr}_6]^{-2}$                                  | -821.5                                                     | -292.8              | -1113.5 | -589.3                                                      | -216.1              | -915.2 |
