# Supplementary material for: Assessment of theoretical prediction of the NMR shielding tensor of195PtClxBr6−x2−complexes by DFT calculations: experimental and computational results
Source: Royal Society of Chemistry journal article supplement (doi:10.1039/b500574d), 2005-01-01
Supplement: tables2.pdf [file tables2.pdf]

**Table S2.** Relative energies (eV) of frontier orbitals with respect to the HOMO for  $\text{PtCl}_6^{2-}$  and  $\text{PtBr}_6^{2-}$  complexes. Eigenvalues have been shifted in order to set the HOMO to 0eV.

| $\text{PtCl}_6^{2-}$<br>MO label | Occupation<br>number | Pt 5d character<br>(%) | $\text{PtCl}_6^{2-}$<br>MO eigenvalue (eV) |
|----------------------------------|----------------------|------------------------|--------------------------------------------|
| 9t <sub>1u</sub>                 | 0.                   | 43.2                   | 9.80                                       |
| 9a <sub>1g</sub>                 | 0.                   | 40.                    | 9.37                                       |
| 8a <sub>1g</sub>                 | 0.                   | 50.2                   | 6.30                                       |
| 5e <sub>g</sub>                  | 0.                   | 35.6                   | 2.04                                       |
| 1t <sub>1g</sub> (HOMO)          | 6.                   | 0.                     | 0.                                         |
| 4t <sub>2g</sub>                 | 6.                   | 26.6                   | -0.25                                      |
| 2t <sub>2u</sub>                 | 6.                   | 0.                     | -0.59                                      |
| 8t <sub>1u</sub>                 | 6                    | 0.                     | -0.62                                      |

| $\text{PtBr}_6^{2-}$<br>MO label | Occupation<br>number | Pt 5d character<br>(%) | $\text{PtBr}_6^{2-}$<br>MO eigenvalues (eV) |
|----------------------------------|----------------------|------------------------|---------------------------------------------|
| 10a <sub>1g</sub>                | 0.                   | 50                     | 7.84                                        |
| 11t <sub>1u</sub>                | 0.                   | 16.9                   | 7.20                                        |
| 9a <sub>1g</sub>                 | 0.                   | 33.4                   | 5.48                                        |
| 7e <sub>g</sub>                  | 0.                   | 29.6                   | 1.47                                        |
| 2t <sub>1g</sub> (HOMO)          | 6.                   | 0.                     | 0.0                                         |
| 6t <sub>2g</sub>                 | 6.                   | 22.3                   | -0.59                                       |
| 10t <sub>1u</sub>                | 6.                   | 0.                     | -0.62                                       |
| 4t <sub>2u</sub>                 | 6                    | 0.                     | -0.63                                       |
